# Supplementary material
Source: publisher figshare collection journal article supplement (https://springernature.figshare.com/ndownloader/files/21504588)
Supplement: Supplementary file 1 [file 21504588]

## Sheet: Sheet1
Table S4. Thirty-seven candidate genes were downregulated by NbERF173
Gene ID	TRV-0	TRV-6	NbERF173-0	NbERF173-6	Annotation
Niben101Scf11319g00003	55.1142	5.0775	153.783	13.0386	2-succinylbenzoate--CoA ligase
Niben101Scf08672g02003	30.6651	2.82535	63.4957	6.78608	Transcription factor MYC2
Niben101Scf08624g00006	12.2676	1.64693	44.0293	3.85866	Serine/threonine-protein kinase 36
Niben101Scf20283g01005	26.7431	0.312551	95.8829	1.27234	lactoylglutathione lyase/glyoxalase I family protein
Niben101Scf07491g00006	11.9242	3.98852	30.4646	8.2122	NAC domain containing protein 36
Niben101Scf06686g01023	1.49596	0.563177	3.98678	2.41936	Jacalin-related lectin 3
Niben101Scf06518g01011	3.64535	0.344242	12.2484	1.25332	alpha/beta-Hydrolases superfamily protein
Niben101Scf07580g00006	4.3315	1.20818	13.8732	2.46122	Calcium uniporter protein 6, mitochondrial
Niben101Scf05363g02005	19.6932	0.636699	58.2605	3.0748	Myb-related protein B
Niben101Scf02886g01003	27.0397	5.87964	60.5744	19.172	Unknown protein
Niben101Scf18347g00001	22.2519	6.54106	56.5062	19.2788	Unknown protein
Niben101Scf01534g02007	5.42826	1.80959	25.9494	4.68669	Annexin D4
Niben101Scf04091g00025	4.35215	1.47178	11.4568	6.69194	Eukaryotic aspartyl protease family protein
Niben101Scf03758g01001	0.978547	0.553239	2.71662	1.24391	Cytochrome P450 superfamily protein
Niben101Scf09596g00002	1.25885	0.447376	2.74967	1.46274	nodulin MtN21 /EamA-like transporter family protein
Niben101Scf00050g03001	28.6185	10.881	78.9119	56.8747	Ubiquitin-conjugating enzyme E2 D3
Niben101Scf02605g07001	26.9839	3.40326	58.7458	14.6029	Calmodulin-like protein 8
Niben101Scf06081g02020	8.31232	1.28269	27.0133	2.91039	alpha/beta-Hydrolases superfamily protein
Niben101Scf01249g01002	17.2446	0.842708	36.9055	1.78236	alpha/beta-Hydrolases superfamily protein
Niben101Scf08196g00012	7.55841	1.47122	21.1702	5.26292	Ethylene-responsive transcription factor 5
Niben101Scf00944g04003	0.887378	0.349875	1.97467	1.24847	NAC domain-containing protein 21/22
Niben101Scf37365g00007	2.04003	0.839638	4.75473	3.30223	BnaC08g02900D [Brassica napus]
Niben101Scf17797g00003	247.304	91.8059	709.59	249.267	Metallothionein-like protein 1
Niben101Scf03160g01004	12.9942	2.02659	62.0254	4.34258	NAC domain-containing protein 90
Niben101Scf00348g10005	12.8221	4.21057	26.4973	8.44262	HXXXD-type acyl-transferase family protein
Niben101Scf01209g05012	9.51322	0.512639	26.6355	1.33615	Remorin family protein
Niben101Scf02772g02001	161.747	23.662	469.284	54.86	allene oxide cyclase 3
Niben101Scf03804g09010	4.36454	2.03891	9.05401	5.48385	nodulin MtN21 /EamA-like transporter family protein
Niben101Scf05316g01002	4.92903	1.8095	11.0925	4.41612	F-box protein PP2-B1
Niben101Scf08977g01003	6.29458	1.74727	16.7011	3.59741	Inner membrane metabolite transport protein YgcS
Niben101Scf13816g00005	223.614	8.15957	460.562	27.5137	allene oxide cyclase 3
Niben101Scf01240g07003	8.97383	2.4121	24.1842	9.75764	zinc finger (Ran-binding) family protein
Niben101Scf00332g09009	9.53762	2.10266	21.8958	11.8061	Nicotianamine synthase
Niben101Scf15077g01012	16.5216	0.335293	41.2188	1.67349	Boron transporter 4
Niben101Scf09570g00015	14.9103	0.381015	44.1335	1.07784	Subtilisin-like protease SBT3.5
Niben101Scf20283g01006	26.7431	0.312551	95.8829	1.27234	Lactoylglutathione lyase / glyoxalase I family protein
Niben101Scf07894g00006	1.95515	0.274567	4.02379	1.54419	BnaC07g10070D [Brassica napus]
Notes:
NbERF173-0h indicated P. parasitica zoospores infecting NbERF173-silenced N. benthamiana leaves for 0 h;
NbERF173-6h indicated P. parasitica zoospores infecting NbERF173-silenced N. benthamiana leaves for 6 h;
TRV-0h indicated P. parasitica zoospores infecting NbERF173 unsilenced N. benthamiana leaves for 0 h;
TRV-6h indicated P. parasitica zoospores infecting NbERF173 unsilenced N. benthamiana leaves for 6 h.
